# Supplementary material for: Activation of the calcium-sensing receptor attenuates TRPV6-dependent intestinal calcium absorption
Source: JCI journal article supplement (doi:10.1172/jci.insight.128013), 2019-04-23
Supplement: sd1 [file 1]

## SUPPORTING FIGURES

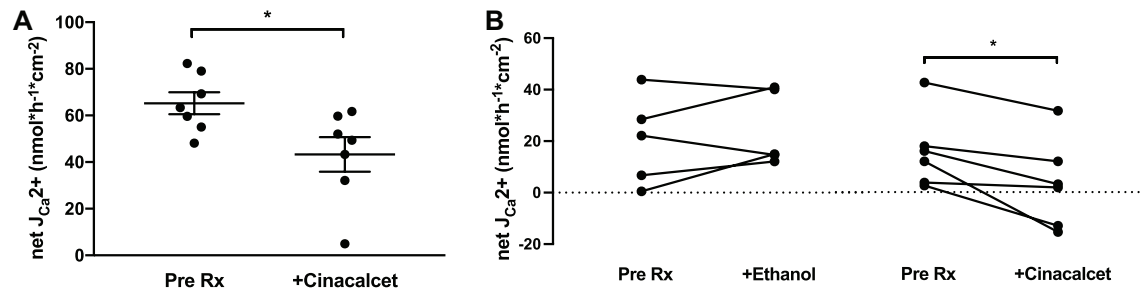

**Figure S1. The effect of basolateral CaSR activation on Ca<sup>2+</sup> fluxes across mouse duodenum (A) and cecum (B).**

(A) The net Ca<sup>2+</sup> flux (net J<sub>Ca<sup>2+</sup></sub>) observed before and after ethanol treated duodenum or cinacalcet treated. N.B. duodenum could not be kept intact for long enough to perform paired experiments (n = 6 each). (B) Changes in the net Ca<sup>2+</sup> flux (net J<sub>Ca<sup>2+</sup></sub>) between Condition A: pre-treatment (Pre Rx) and Condition B: vehicle (ethanol) or basolateral 10 μM cinacalcet (n = 6 each). Raw values are presented; asterisks indicate a statistical difference between the conditions (student's unpaired t-test for (A) and paired t-tests for (B); \*P < 0.05).

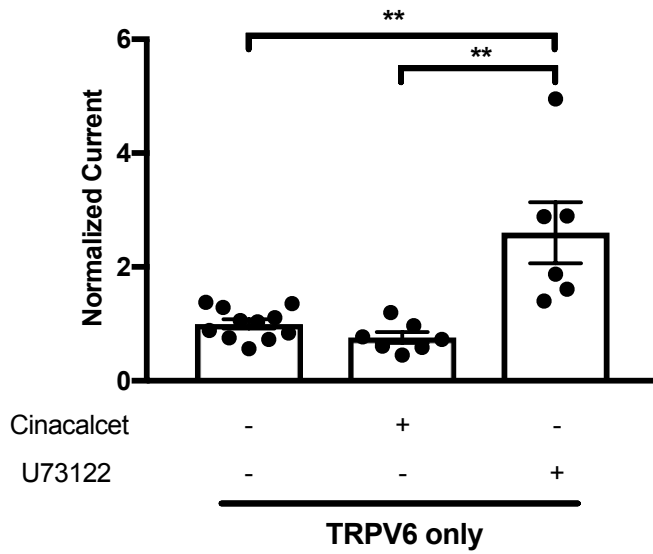

**Figure S2.  $\text{Ca}^{2+}$ -induced currents ( $I_{\text{Ca}}$ ) in TRPV6 expressing oocytes in the presence or absence of cinacalcet and/or U73122.**

Mean  $I_{\text{Ca}}$  values were normalized to the vehicle  $I_{\text{Ca}}$  values from TRPV6 expressing oocytes  $\pm$  SEM; asterisks indicate a statistically significant difference between the conditions (multiple comparisons non-parametric test;  $**P < 0.01$ ) (n = 12, 7, and 6 from left to right).

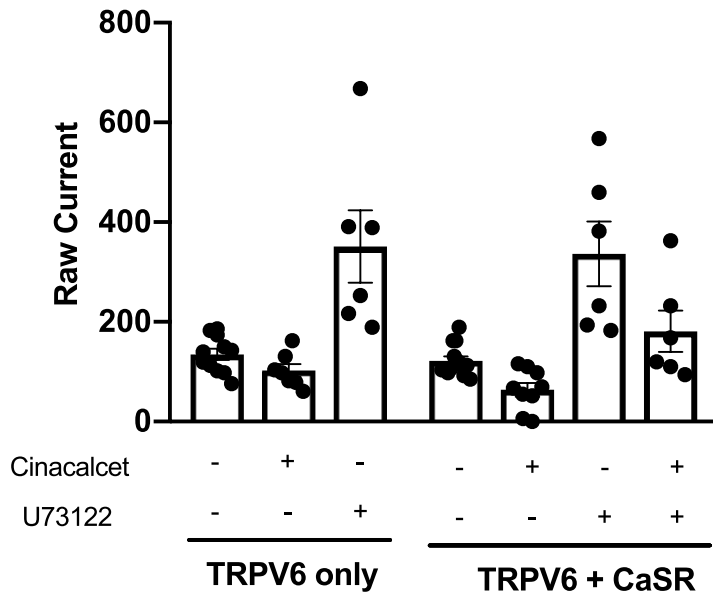

**Figure S3. Raw current in TRPV6 only and TRPV6 and CaSR expressing oocytes, in presence and absence of cinacalcet and/or U73122. Refer to Fig. S1 and 6A for sample size.**

**Table S1. Transepithelial Resistance ( $\Omega \cdot \text{cm}^2$ ) of Ussing Chamber Experiments (Figs. 3 - 7)**

|                                         | <b>Before (Condition A)</b> | <b>After (Condition B)</b> |
|-----------------------------------------|-----------------------------|----------------------------|
| Figure 3B. Vehicle                      | 68.7 $\pm$ 3.9              | 45.1 $\pm$ 1.0             |
| Figure 3B. Cinacalcet                   | 52.4 $\pm$ 2.3              | 40.5 $\pm$ 3.2             |
| Figure 3C. High to Low                  | 56.8 $\pm$ 1.6              | 37.2 $\pm$ 0.9             |
| Figure 3C. Low to High                  | 64.7 $\pm$ 2.5              | 43.6 $\pm$ 1.9             |
| Figure 4B. Cinacalcet (AP)              | 65.1 $\pm$ 3.7              | 44.2 $\pm$ 2.5             |
| Figure 4C. Cinacalcet (BL)              | 60.9 $\pm$ 3.4              | 37.0 $\pm$ 2.0             |
| Figure 5A. TRPV6 <sup>WT/WT</sup>       | 60.4 $\pm$ 1.2              | 38.3 $\pm$ 2.0             |
| Figure 5A. TRPV6 <sup>D541A/D541A</sup> | 64.2 $\pm$ 2.4              | 38.8 $\pm$ 2.3             |
| Figure 5B. TRPV6 <sup>WT/WT</sup>       | 56.8 $\pm$ 1.6              | 37.2 $\pm$ 0.9             |
| Figure 5B. TRPV6 <sup>D541A/D541A</sup> | 59.2 $\pm$ 2.4              | 41.1 $\pm$ 2.4             |
| Figure 7. Vehicle                       | 66.3 $\pm$ 3.3              | 39.6 $\pm$ 2.2             |
| Figure 7. U73122                        | 66.9 $\pm$ 2.0              | 47.2 $\pm$ 3.1             |
